# Supplementary material for: COVID‐19: An Overview of SARS‐CoV‐2 Variants—The Current Vaccines and Drug Development
Source: Hindawi journal article supplement (doi:10.1155/2023/1879554), 2023-01-01
Supplement: f1 [file 1879554.f1.pdf]

Supplementary Table: Vaccine development [1].

| Vaccine candidate                                                                                       | Vaccine platform               | Developer                                                                           | Dosage                   | Vaccination methods | Clinical stage |
|---------------------------------------------------------------------------------------------------------|--------------------------------|-------------------------------------------------------------------------------------|--------------------------|---------------------|----------------|
| <b>Viral Vectored Vaccine</b>                                                                           |                                |                                                                                     |                          |                     |                |
| <b>ChAdOx1-S - (AZD1222)</b><br><b>Covishield</b><br><b>Vaxzevria</b>                                   | Viral vector (Non-replicating) | AstraZeneca + University of Oxford                                                  | 1-2<br>(Day0+28)         | IM                  | 4              |
| <b>Recombinant novel coronavirus vaccine (Adenovirus type 5 vector) Ad5-nCoV</b>                        | Viral vector (Non-replicating) | CanSino Biological Inc./Beijing Institute of Biotechnology                          | 1<br>(Day0)              | IM                  | 4              |
| <b>Recombinant COVID-19 vaccine (adenovirus type 5 vector) for Inhalation (Ad5-nCoV-IH)</b>             | Viral vector (Non-replicating) | CanSino Biological Inc./Beijing Institute of Biotechnology                          | 1<br>(Day0)              | IH                  | 4              |
| <b>Gam-COVID-Vac</b> <b>Adeno-based</b><br><b>(rAd26-S+rAd5-S)</b><br><b>Sputnik V COVID-19 vaccine</b> | Viral vector (Non-replicating) | Gamaleya Research Institute ; Health Ministry of the Russian Federation             | 2<br>(Day0+21)           | IM                  | 3              |
| <b>Ad26.COV2.S</b>                                                                                      | Viral vector (Non-replicating) | Janssen Pharmaceutical                                                              | 1-2<br>(Day0 or Day0+56) | IM                  | 4              |
| <b>GRAd-COV2 (Replication defective Simian Adenovirus (GRAd) encoding S)</b>                            | Viral vector (Non-replicating) | ReiThera + Leukocare + Univercells                                                  | 1<br>(Day0)              | IM                  | 2/3            |
| <b>VXA-CoV2-1 Ad5 adjuvanted Oral Vaccine platform</b>                                                  | Viral vector (Non-replicating) | Vaxart                                                                              | 2<br>(Day0+28)           | Oral                | 2              |
| <b>MVA-SARS-2-S</b>                                                                                     | Viral vector (Non-replicating) | University of Munich (Ludwig-Maximilians)                                           | 2<br>(Day0+28)           | IM                  | 1              |
| <b>V591-001 - Measles-vector based (TMV-o38)</b>                                                        | Viral vector (Replicating)     | Merck & Co. + Themis + Sharp & Dohme + Institute Pasteur + Univeristy of Pittsburgh | 1-2<br>(Day0+28)         | IM                  | 1/2            |

|                                                                                                                                                                                                                     |                                      |                                                                                   |                |         |     |
|---------------------------------------------------------------------------------------------------------------------------------------------------------------------------------------------------------------------|--------------------------------------|-----------------------------------------------------------------------------------|----------------|---------|-----|
| <b>DelNS1-2019-nCoV-RBD-OPT1 (Intranasal flu-based-RBD )</b>                                                                                                                                                        | Viral vector (Replicating)           | University of Hong Kong, Xiamen University and Beijing Wantai Biological Pharmacy | 2 (Day0+28)    | IN      | 3   |
| <b>Covid-19/aAPC vaccine. The Covid-19/aAPC vaccine is prepared by applying lentivirus modification with immune modulatory genes and the viral minigenes to the artificial antigen presenting cells (aAPCs).</b>    | Viral vector (Replicating) + APC     | Shenzhen Geno-Immune Medical Institute*                                           | 3 (Day0+14+28) | SC      | 1   |
| <b>LV-SMENP-DC vaccine. Dendritic cells are modified with lentivirus vectors expressing Covid-19 minigene SMENP and immune modulatory genes. CTLs are activated by LV-DC presenting Covid-19 specific antigens.</b> | Viral vector (Non-replicating) + APC | Shenzhen Geno-Immune Medical Institute*                                           | 1 (Day0)       | SC & IV | 1/2 |
| <b>Human Adenovirus Type 5: hAd5 S+N vaccine (S-Fusion + N-ETSD). E2b-Deleted Adeno.</b>                                                                                                                            | Viral vector (Non-replicating)       | ImmunityBio, Inc                                                                  | 1-2 (Day0+21)  | SC      | 1/2 |
| <b>COH04S1 (MVA-SARS-2-S) - Modified vaccinia ankara (sMVA) platform + synthetic SARS-CoV-2</b>                                                                                                                     | Viral vector (Non-replicating)       | City of Hope Medical Center + National Cancer Institute                           | 1-2 (Day0+28)  | IM      | 2/3 |
| <b>rVSV-SARS-CoV-2-S Vaccine</b>                                                                                                                                                                                    | Viral vector (Replicating)           | Israel Institute for Biological Research                                          | 1 (Day0)       | IM      | 2/3 |
| <b>Dendritic cell vaccine AV-COVID-19. A vaccine consisting of autologous dendritic cells loaded</b>                                                                                                                | Viral vector (Replicating) + APC     | Aivita Biomedical, Inc.                                                           | 1 (Day0)       | IM      | 2   |
| <b>AdCLD-CoV19 (adenovirus vector)</b>                                                                                                                                                                              | Viral vector (Replicating)           | Cellid Co.,Ltd.*                                                                  | 1 (Day0)       | IM      | 2   |
| <b>AdCOVID, Adenovirus-based platform expresses receptor-binding domain (RBD) of spike protein</b>                                                                                                                  | Viral vector (Non-replicating)       | Altimmune, Inc.                                                                   | 1-2 (Day0)     | IN      | 1   |

|                                                                                                                                                                     |                                |                                                            |                                       |    |     |
|---------------------------------------------------------------------------------------------------------------------------------------------------------------------|--------------------------------|------------------------------------------------------------|---------------------------------------|----|-----|
| <b>BBV154, Adenoviral vector COVID-19 vaccine</b>                                                                                                                   | Viral vector (Non-replicating) | Bharat Biotech International Limited                       | 1 (Day0)                              | IN | 3   |
| <b>Modified Vaccinia Virus Ankara (MVA) vector expressing a stabilized SARS-CoV-2 spike protein</b>                                                                 | Viral vector (Non-replicating) | German Center for Infection Research                       | 2 (Day0+28)                           | IM | 1/2 |
| <b>Chimpanzee Adenovirus serotype 68 (ChAd) and self-amplifying mRNA (SAM) vectors expressing spike alone, or spike plus additional SARS-CoV-2 T cell epitopes.</b> | Viral vector (Non-replicating) | Gritstone Oncology                                         | 2-3 (Day 0+14+28 or 0+28+56 or 0+112) | IM | 1   |
| <b>COVIVAC. Newcastle Disease Virus (NDV) expressing membrane-anchored pre-fusion-stabilized</b>                                                                    | Viral vector (replicating)     | Institute of Vaccines and Medical Biologicals, Vietnam     | 2 (Day 0+28)                          | IM | 1/2 |
| <b>SC-Ad6-1, Adnevirial vector vaccine</b>                                                                                                                          | Viral vector (Non-replicating) | Tetherex Pharmaceuticals Corporation                       | 1-2 (Day 0 +/- 21)                    | IM | 2   |
| <b>PIV5 vector that encodes the SARS-CoV-2 spike protein</b>                                                                                                        | Viral vector (Non-replicating) | CyanVac LLC                                                | 1 (Day 0)                             | IN | 2   |
| <b>AZD2816; adenoviral vector ChAdOx platform and based on the Beta (B.1.351) variant</b>                                                                           | Viral vector (Non-replicating) | AstraZeneca + University of Oxford                         | 2 (Day0+28)                           | IM | 2/3 |
| <b>AAV5-RBD-S vaccine (BCD-250), A recombinant Adenovirus-Associated viral Vector (AAV-5) encoding spike protein</b>                                                | Viral vector (Non-replicating) | Biocad                                                     | 1 (Day0)                              | IM | 1/2 |
| <b>Ad5-triCoV/Mac or ChAd-triCoV/Mac, new experimental adenovirus-based vaccines expressing SARS-CoV-2 spike, nucleocapsid and RNA polymerase proteins</b>          | Viral vector (Non-replicating) | McMaster University                                        | 1 (Day0)                              | AE | 1   |
| <b>Ad26.cov2.s+bcg vaccine. AD26-BCG</b>                                                                                                                            | Viral vector (Non-replicating) | Han Xu, M.D., Ph.D., FAPCR, Sponsor-Investigator, IRB Chai | 1 (Day0)                              | ID | 1   |

|                                                                                                                           |                                                      |                                                                         |                |      |     |
|---------------------------------------------------------------------------------------------------------------------------|------------------------------------------------------|-------------------------------------------------------------------------|----------------|------|-----|
| <b>NDV-HXP-S; A Live Recombinant Newcastle Disease Virus-vectored COVID-19 Vaccine</b>                                    | Viral vector (Replicating)                           | Sean Liu, Icahn School of Medicine at Mount Sinai                       | 1 (Day0)       | IN   | 2/3 |
| <b>MVA-SARS-2-ST Vaccine</b>                                                                                              | Viral vector (Non-replicating)                       | Hannover Medical School                                                 | 1 (Day0)       | IH   | 1   |
| <b>Convidecia Vaccine (Ad5-nCoV). Bivalent Recombinant COVID-19 Vaccine (Adenovirus Type 5 Vector)</b>                    | Viral vector (Non-replicating)                       | CanSino Biologics Inc.                                                  | 2 (Day 0+21)   | IM   | 3   |
| <b>CoVaxHGMix adenoviral vector vaccine</b>                                                                               | Viral vector (Non-replicating)                       | Ankara City Hospital Bilkent                                            | 2 (Day 0+28)   | IM   | 1   |
| <b>H3N2 recombinant attenuated influenza vector with modified NS gene coding for the N protein fragment of SARS-CoV-2</b> | Viral vector (Non-replicating)                       | Research Institute of Influenza                                         | 2 (Day 0+21)   | IN   | 1/2 |
| <b>Recombinant COVID-19 Vaccine (Adenovirus Vector)</b>                                                                   | Viral vector (Non-replicating)                       | Wuhan BravoVax                                                          | 1 (Day0)       | IN   | 1   |
| <b>COVID19 Oral Vaccine Consisting of Bacillus Subtilis Spores</b>                                                        | BacAg-SpV -Bacterial antigen-spore expression vector | DreamTec Research Limited                                               | 3 (Day0+14+28) | Oral | NA  |
| <b>DNA and RNA vaccine</b>                                                                                                |                                                      |                                                                         |                |      |     |
| <b>CVnCoV Vaccine</b>                                                                                                     | RNA based vaccine                                    | Curevac AG                                                              | 2 (Day0+28)    | IM   | 3   |
| <b>mRNA-1273 (Spikevax )</b>                                                                                              | RNA based vaccine                                    | Moderna + National Institute of Allergy and Infectious Diseases (NIAID) | 2 (Day0+28)    | IM   | 4   |
| <b>BNT162b2 (3 LNP-mRNAs ), also known as "Comirnaty"</b>                                                                 | RNA based vaccine                                    | Pfizer/BioNTech + Fosun Pharma                                          | 2 (Day0+21)    | IM   | 4   |
| <b>INO-4800+electroporation</b>                                                                                           | DNA based vaccine                                    | Inovio Pharmaceuticals + International Vaccine Institute + Advaccine    | 2 (Day0+28)    | ID   | 3   |
| <b>AG0301-COVID19</b>                                                                                                     | DNA based vaccine                                    | AnGes + Takara Bio + Osaka University                                   | 2 (Day0+14)    | IM   | 2/3 |
| <b>nCov vaccine</b>                                                                                                       | DNA based vaccine                                    | Zydus Cadila                                                            | 3 (Day0+28+56) | ID   | 3   |
| <b>GX-19</b>                                                                                                              | DNA based vaccine                                    | Genexine Consortium                                                     | 2 (Day0+28)    | IM   | 2/3 |

|                                                                                                                                               |                   |                                                                                       |                                   |      |     |
|-----------------------------------------------------------------------------------------------------------------------------------------------|-------------------|---------------------------------------------------------------------------------------|-----------------------------------|------|-----|
| <b>ARCT-021</b>                                                                                                                               | RNA based vaccine | Arcturus Therapeutics                                                                 | NR                                | IM   | 2   |
| <b>LNP-nCoVsaRNA</b>                                                                                                                          | RNA based vaccine | Imperial College London                                                               | NR                                | IM   | 1   |
| <b>SARS-CoV-2 mRNA vaccine (ARCoV)</b>                                                                                                        | RNA based vaccine | Academy of Military Science (AMS), Walvax Biotechnology and Suzhou Abogen Biosciences | 2<br>(Day0+14)<br>Or<br>(Day0+28) | IM   | 3   |
| <b>Covigenix VAX-001 - DNA vaccines + PLV formulation</b>                                                                                     | DNA based vaccine | Entos Pharmaceuticals Inc.                                                            | 2<br>(Day0+14)                    | IM   | 1   |
| <b>CORVax - S Protein Plasmid DNA Vaccine</b>                                                                                                 | DNA based vaccine | OncoSec Immunotherapies; Providence Health & Services                                 | 2<br>(Day0+14)                    | ID   | 1   |
| <b>bacTRL-Spike oral DNA vaccine</b>                                                                                                          | DNA based vaccine | Symvivo Corporation                                                                   | 1<br>(Day0)                       | Oral | 1   |
| <b>GLS-5310</b>                                                                                                                               | DNA based vaccine | GeneOne Life Science, Inc.*                                                           | 2<br>(Day0+56)<br>Or<br>(Day0+84) | ID   | 1/2 |
| <b>COVIGEN</b>                                                                                                                                | DNA based vaccine | University of Sydney, Bionet Co., Ltd                                                 | 2<br>(Day0+28)                    | ID   | 1   |
| <b>COVID-eVax, a candidate plasmid DNA vaccine of the Spike protein</b>                                                                       | DNA based vaccine | Takis + Rottapharm Biotech                                                            | 2<br>( Day0+28)                   | IM   | 1/2 |
| <b>EXG-5003; a temperature-sensitive self-replicating RNA vaccine expressing the receptor binding domain of the SARS-CoV-2 spike protein.</b> | RNA based vaccine | Elixirgen Therapeutics, Inc                                                           | 1<br>(Day0)                       | ID   | 1/2 |
| <b>LNP-nCOV saRNA-02 vaccine; Self-amplifying RNA (saRNA) encapsulated in lipid nanoparticles (LNP)</b>                                       | RNA based vaccine | MRC/UVRI and LSHTM Uganda Research Unit                                               | 2<br>( Day0+28)                   | IM   | 1   |
| <b>AG0302-COVID19</b>                                                                                                                         | DNA based vaccine | AnGes, Inc                                                                            | 2-3<br>(Day0+14+28)               | IM   | 1/2 |

|                                                                                                                                                           |                   |                                                         |                                   |    |     |
|-----------------------------------------------------------------------------------------------------------------------------------------------------------|-------------------|---------------------------------------------------------|-----------------------------------|----|-----|
| <b>Plasmid DNA vaccine SCOVI + SCOVI2. COVIDITY</b>                                                                                                       | DNA based vaccine | Scancell Ltd                                            | 2<br>( Day0+28)                   | ID | 1   |
| <b>VB10.2129, a DNA plasmid vaccine, encoding the receptor binding domain (RBD)</b>                                                                       | DNA based vaccine | Vaccibody AS                                            | 1-2<br>( Day0+21)                 | IM | 1/2 |
| <b>VB10.2210, DNA plasmid vaccine, encodes multiple immunogenic and conserved T cell epitopes spanning multiple antigens across the SARS-CoV-2 genome</b> | DNA based vaccine | Vaccibody AS                                            | 1-2<br>( Day0+21)                 | IM | 1/2 |
| <b>SARS-CoV-2 DNA vaccine (delivered IM followed by electroporation)</b>                                                                                  | DNA based vaccine | The University of Hong Kong; Immuno Cure 3 Limited      | 2<br>( Day0+21)                   | IM | 1   |
| <b>Prophylactic pDNA Vaccine Candidate Against COVID-19</b>                                                                                               | DNA based vaccine | Imam Abdulrahman Bin Faisal University                  | 3<br>(Day 0+21+42)                | IM | 1   |
| <b>Booster DNA vaccine delivered by in vivo "EPS Gun" from IGEA optimized for Electro Gene Transfer (EGT) vaccination</b>                                 | DNA based vaccine | Matti Sällberg, Karolinska Institutet                   | 1<br>(Day 0)                      | IM | 1   |
| <b>SARS-CoV-2 mRNA vaccine (ARCoV)</b>                                                                                                                    | RNA based vaccine | AMS, Walvax Biotechnology and Suzhou Abogen Biosciences | 2<br>(Day0+14)<br>Or<br>(Day0+28) | IM | 3   |
| <b>mRNA-1273.529 - Booster</b>                                                                                                                            | RNA based vaccine | ModernaTX, Inc.                                         | 1<br>(Day 0)                      | IM | 2/3 |
| <b>CV2CoV, mRNA vaccine</b>                                                                                                                               | RNA based vaccine | CureVac AG                                              | 1<br>(Day 0)                      | IM | 1   |
| <b>mRNA vaccine (MIPSCo-mRNA-RBD-1)</b>                                                                                                                   | RNA based vaccine | University of Melbourne                                 | 1<br>(Day 0)                      | IM | 1   |
| <b>A Lyophilized COVID-19 mRNA Vaccine</b>                                                                                                                | RNA based vaccine | Jiangsu Rec-Biotechnology Co., Ltd.                     | 1<br>(Day 0)                      | IM | 1   |
| <b>COVID-19 mRNA Vaccine (SYS6006)</b>                                                                                                                    | RNA based vaccine | CSPC ZhongQi Pharmaceutical Technology Co., Ltd.        | 2<br>(Day 0+ 21)                  | IM | 2   |
| <b>mRNA GEMCOVAC-19 (COVID-19 vaccine)</b>                                                                                                                | RNA based vaccine | Gennova Biopharmaceuticals Limited                      | 2<br>(Day 0+ 28)                  | IM | 2/3 |
| <b>Lyophilized COVID-19 mRNA Vaccine</b>                                                                                                                  | RNA based vaccine | Wuhan Recogen Biotechnology Co., Ltd.                   | 1                                 | IM | 1   |

|                                                                             |                   |                                                        |                       |    |     |
|-----------------------------------------------------------------------------|-------------------|--------------------------------------------------------|-----------------------|----|-----|
|                                                                             |                   |                                                        | (Day 0)               |    |     |
| <b>A self-amplifying RNA (saRNA) boost vaccines (AAHI-SC2 and AAHI-SC3)</b> | RNA based vaccine | ImmunityBio, Inc.                                      | 1<br>(Day 0)          | IM | 1/2 |
| <b>RQ3013: SARS-CoV-2 mRNA Chimera Vaccine</b>                              | RNA based vaccine | Walvax Biotechnology;<br>Shanghai RNACure<br>Biopharma | 1<br>(Day 0)          | IM |     |
| <b>mRNA-1273.214 (Booster)</b>                                              | RNA based vaccine | ModernaTX                                              | 2<br>(Day0+55)        | IM | 3   |
| <b>mRNA-1073; (COVID-19/Influenza) Vaccine</b>                              | RNA based vaccine | ModernaTX                                              | 2<br>(Day 0)          | IM | 1/2 |
| <b>RVM-V001</b>                                                             | RNA based vaccine | RVAC Medicines                                         | 1<br>(Day 0)          | IM | 1   |
| <b>ABO1009-DP (COVID-19 Omicron) mRNA Vaccine</b>                           | RNA based vaccine | Suzhou Abogen Biosciences<br>Co., Ltd.                 | 1<br>(Day 0)          | IM | 1   |
| <b>Self-Amplifying Messenger Ribonucleic Acid (samRNA) Vaccines</b>         | RNA based vaccine | Gritstone bio, Inc.                                    | 2<br>(Day0+28)        | IM | 1   |
| <b>Investigational CV0501 mRNA COVID-19 Vaccine</b>                         | RNA based vaccine | GlaxoSmithKline                                        | 1<br>(Day 0)          | IM | 1   |
| <b>GLB-COV2-043, an mRNA booster vaccine candidate</b>                      | RNA based vaccine | GreenLight Biosciences, Inc.                           | 1<br>(Day 0)          | IM | 1/2 |
| <b>mRNA-based COVID-19 vaccine (COReNAPCIN)</b>                             | RNA based vaccine | ReNAP Technology                                       | 1<br>(Day 0)          | IM | 1   |
| <b>JCXH-221, an mRNA-based</b>                                              | RNA based vaccine | Immorna Biotherapeutics,<br>Inc.                       | 1<br>(Day 0)          | IM | 1/2 |
| <b>HDT-301 vaccine</b>                                                      | RNA based vaccine | HDT Bio                                                | 2<br>(Day 0 ± 56)     | IM | 1   |
| <b>EG-COVID vaccine</b>                                                     | RNA based vaccine | EyeGene Inc.                                           | 3<br>(Day<br>0+21+42) | IM | 1/2 |
| <b>Coronavirus mRNA vaccine (LVRNA009)</b>                                  | RNA based vaccine | AIM Vaccine and Liverna<br>Therapeutics                | 2<br>(Day0+28)        | IM | 3   |
| <b>VLPCOV-01, self-amplifying RNA vaccine against the coronavirus</b>       | RNA based vaccine | VLP Therapeutics Japan GK                              | 2<br>NR               | IM | 1   |
| <b>ChulaCov19 mRNA vaccine</b>                                              | RNA based vaccine | Chulalongkorn University                               | 2                     | IM | 2   |

|                                                                                                               |                   |                                                                         |                                      |    |     |
|---------------------------------------------------------------------------------------------------------------|-------------------|-------------------------------------------------------------------------|--------------------------------------|----|-----|
|                                                                                                               |                   |                                                                         | (Day0+21)                            |    |     |
| <b>PTX-COVID19-B, mRNA vaccine</b>                                                                            | RNA based vaccine | Providence Therapeutics                                                 | 2<br>(Day0+28)                       | IM | 3   |
| <b>CoV2 SAM (LNP) vaccine. A self-amplifying mRNA (SAM) lipid nanoparticle (LNP) platform + Spike antigen</b> | RNA based vaccine | GlaxoSmithKline                                                         | 2<br>(Day0+30)                       | IM | 1   |
| <b>mRNA-1273.351.</b>                                                                                         | RNA based vaccine | Moderna + National Institute of Allergy and Infectious Diseases (NIAID) | 3<br>(Day 0 or Day 0 + 28 or Day 56) | IM | 4   |
| <b>MRT5500, an mRNA vaccine candidate</b>                                                                     | RNA based vaccine | Sanofi Pasteur and Translate Bio                                        | 2<br>(Day0+21)                       | IM | 2   |
| <b>DS-5670a,coronavirus-modified uridine RNA vaccine (SARS-CoV-2)</b>                                         | RNA based vaccine | Daiichi Sankyo Co., Ltd.                                                | 2<br>NR                              | IM | 2/3 |
| <b>HDT-301: Self-replicating mRNA vaccine formulated as a lipid nanoparticle. NA MCTI CIMATEC HDT</b>         | RNA based vaccine | SENAI CIMATEC                                                           | 2<br>(Day0+28)                       | IM | 2/3 |
| <b>mRNA-1283</b>                                                                                              | RNA based vaccine | ModernaTX, Inc.                                                         | 2<br>(Day0+28)                       | IM | 1   |
| <b>mRNA COVID-19 vaccine (SW-BIC-213)</b>                                                                     | RNA based vaccine | Shanghai East Hospital and Stemirna Therapeutics                        | 2<br>TBD                             | IM | 1   |
| <b>mRNA-1273.211. A multivalent booster candidate combining mRNA-1273 plus mRNA-1273.351.</b>                 | RNA based vaccine | ModernaTX, Inc.                                                         | 1<br>( Day 0 )                       | IM | 2/3 |
| <b>ARCT-154 mRNA Vaccine</b>                                                                                  | RNA based vaccine | Arcturus Therapeutics, Inc.                                             | 2<br>(Day0+28)                       | IM | 3   |
| <b>ARCT-165 mRNA Vaccine</b>                                                                                  | RNA based vaccine | Arcturus Therapeutics, Inc.                                             | 2<br>(Day0+29)                       | IM | 1/2 |
| <b>ARCT-021 mRNA Vaccine</b>                                                                                  | RNA based vaccine | Arcturus Therapeutics, Inc.                                             | 2<br>(Day0+30)                       | IM | 1/2 |
| <b>VLP vaccines</b>                                                                                           |                   |                                                                         |                                      |    |     |
| <b>RBD SARS-CoV-2 HBsAg VLP vaccine</b>                                                                       | VLP               | Serum Institute of India + Accelagen Pty + SpyBiotech                   | 2<br>(Day0+28)                       | IM | 1/2 |



|                                                                                                                         |                   |                                                                      |                   |    |     |
|-------------------------------------------------------------------------------------------------------------------------|-------------------|----------------------------------------------------------------------|-------------------|----|-----|
| <b>CoVLP</b>                                                                                                            | VLP               | Medicago Inc.                                                        | 2<br>(Day0+21)    | IM | 3   |
| <b>VBI-2902a. An enveloped virus-like particle (eVLP) of SARS-CoV-2 spike (S)</b>                                       | VLP               | VBI Vaccines Inc.                                                    | 2<br>(Day0+28)    | IM | 1/2 |
| <b>SARS-CoV-2 VLP Vaccine</b>                                                                                           | VLP               | The Scientific and Technological Research Council of Turkey          | 2<br>Day 0        | SC | 2   |
| <b>ABNCoV2 capsid virus-like particle (cVLP) +/- adjuvant MF59</b>                                                      | VLP               | Radboud University                                                   | 2<br>(Day0+28)    | IM | 3   |
| <b>SARS-CoV-2 Vaccine LYB001, a receptor-binding domain (RBD) from SARS-CoV-2 and virus-like particle (VLP)</b>         | VLP               | Yantai Patronus Biotech Co., Ltd.                                    | 3<br>(Day0+28+56) | IM | 3   |
| <b>VBI-2901e. The trivalent vaccine composed of virus-like particles (eVLPs) to express the spike proteins of three</b> | VLP               | VBI Vaccines Inc.                                                    | 2<br>(Day0+28)    | IM | 1   |
| <b>Whole-Virus Vaccines</b>                                                                                             |                   |                                                                      |                   |    |     |
| <b>CoronaVac; inactivated SARS-CoV-2 vaccine (vero cell)</b>                                                            | Inactivated virus | Sinovac Research and Development Co., Ltd                            | 2<br>(Day0+14)    | IM | 4   |
| <b>Inactivated SARS-CoV-2 vaccine (Vero cell)</b>                                                                       | Inactivated virus | Sinopharm                                                            | 2<br>(Day0+21)    | IM | 4   |
| <b>Inactivated SARS-CoV-2 vaccine (Vero cell), vaccine name BBIBP-CorV</b>                                              | Inactivated virus | Sinopharm                                                            | 2<br>(Day0+21)    | IM | 4   |
| <b>SARS-CoV-2 vaccine (vero cells)</b>                                                                                  | Inactivated virus | Institute of Medical Biology + Chinese Academy of Medical Sciences   | 2<br>(Day0+28)    | IM | 3   |
| <b>QazCovid-in® - COVID-19 inactivated vaccine</b>                                                                      | Inactivated virus | Research Institute for Biological Safety Problems, Rep of Kazakhstan | 2<br>(Day0+21)    | IM | 3   |
| <b>BBV152 vaccine</b>                                                                                                   | Inactivated virus | Bharat Biotech International Limited                                 | 2<br>(Day0+14)    | IM | 3   |
| <b>Covi Vax, inactivated coronavirus vaccine</b>                                                                        | Inactivated virus | National Research Centre, Egypt                                      | 2<br>(Day0+28)    | IM | 1   |

|                                                                                                 |                       |                                                                       |                          |    |     |
|-------------------------------------------------------------------------------------------------|-----------------------|-----------------------------------------------------------------------|--------------------------|----|-----|
| <b>Inactivated SARS-CoV-2 vaccine (Vero cell)</b>                                               | Inactivated virus     | Shenzhen Kangtai Biological Products Co., Ltd.                        | 2<br>(Day 0+28)          | IM | 3   |
| <b>COVI-VAC</b>                                                                                 | Live attenuated virus | Codagenix/Serum Institute of India                                    | 1-2<br>(Day0 or Day0+28) | IN | 3   |
| <b>VLA2001</b>                                                                                  | Inactivated Virus     | Valneva, National Institute for Health Research, United Kingdom*      | 2<br>(Day0+21)           | IM | 3   |
| <b>TURKOVAC, inactivated virus</b>                                                              | Inactivated Virus     | Erciyes University and the Health Institutes of Turkey (TUSEB)        | 2<br>(Day0+21)           | IM | 3   |
| <b>COVID-19 inactivated vaccine, (CovIran-Barkat)</b>                                           | Inactivated Virus     | Shifa Pharmed Industrial Co                                           | 2<br>(Day0+14)           | IM | 2/3 |
| <b>Inactivated (NDV-based) chimeric vaccine with or without the adjuvant CpG 1018</b>           | Inactivated Virus     | The Government Pharmaceutical Organization (GPO); PATH; Dynavax       | 2<br>(Day0+28)           | IM | 1/2 |
| <b>Inactivated SARS-CoV-2 vaccine FAKHRAVAC (MIVAC)</b>                                         | Inactivated Virus     | Organization of Defensive Innovation and Research                     | 2<br>(Day 0 + 14 +/- 21) | IM | 1   |
| <b>MV-014-212, a live attenuated vaccine that expresses the spike (S) protein of SARS-CoV-2</b> | Live attenuated virus | Meissa Vaccines, Inc.                                                 | 1<br>(Day 0 )            | IN | 1   |
| <b>Koçak-19 Inactivated adjuvant COVID-19 viral vaccine (TURKOVAC)</b>                          | Inactivated Virus     | Kocak Farma                                                           | 2<br>(Day0+21)           | IM | 1   |
| <b>Adjuvanted inactivated vaccine against SARS-CoV-2</b>                                        | Inactivated Virus     | The Scientific and Technological Research Council of Turkey (TÜBİTAK) | 2<br>(Day0+21)           | SC | 1   |
| <b>Inactivated COVID-19 vaccine</b>                                                             | Inactivated Virus     | KM Biologics Co., Ltd.                                                | 2<br>(Day0+28)           | IM | 3   |

|                                                                         |                   |                                                                                                   |                |    |     |
|-------------------------------------------------------------------------|-------------------|---------------------------------------------------------------------------------------------------|----------------|----|-----|
| <b>Live recombinant Newcastle Disease Virus (rNDV) vector vaccine</b>   | Inactivated Virus | Laboratorio Avi-Mex                                                                               | 2<br>(Day0+21) | IM | 2/3 |
| <b>Inactivated Whole Virion Concentrated Purified Vaccine (CoviVac)</b> | Inactivated Virus | Chumakov Federal Scientific Center for Research and Development of Immune-and-Biological Products | 2<br>(Day0+14) | IM | 3   |
| <b>Osvid-19 inactivated vaccine for Covid-19</b>                        | Inactivated Virus | Osve Pharmaceutical Company                                                                       | 2<br>(Day0+28) | IM | 1   |
| <b>EgyVax Inactivated SARS-CoV-2 vaccine candidate</b>                  | Inactivated Virus | Eva Pharma                                                                                        | 2<br>(Day0+14) | IM | 1   |
| <b>UNAIR Inactivated COVID-19 Vaccine</b>                               | Inactivated Virus | Airlangga University, Indonesia                                                                   | 2<br>(Day0)    | IM | 3   |
| <b>Omicron COVID-19 inactivated Vaccine (Vero Cell)</b>                 | Inactivated Virus | China National Biotec Group Company Limited                                                       | 2<br>(Day0+28) | IM | 3   |

#### **Protein Subunit Vaccine**

|                                                                                                                                         |                 |                                                                                                 |                                        |    |     |
|-----------------------------------------------------------------------------------------------------------------------------------------|-----------------|-------------------------------------------------------------------------------------------------|----------------------------------------|----|-----|
| <b>SARS-CoV-2 rS/Matrix M1-Adjuvant (Full length recombinant SARS CoV-2 glycoprotein nanoparticle vaccine adjuvanted with Matrix M)</b> | Protein subunit | Novavax                                                                                         | 2<br>(Day0+21)                         | IM | 3   |
| <b>Recombinant SARS-CoV-2 vaccine (CHO Cell)</b>                                                                                        | Protein subunit | Anhui Zhifei Longcom Biopharmaceutical + Institute of Microbiology, Chinese Academy of Sciences | 2-3<br>(Day0+28)<br>Or<br>(Day0+28+56) | IM | 3   |
| <b>KBP-COVID-19 (RBD-based)</b>                                                                                                         | Protein subunit | Kentucky Bioprocessing Inc.                                                                     | 2<br>(Day0+21)                         | IM | 1/2 |
| <b>VAT00002: SARS-CoV-2 S protein with adjuvant</b>                                                                                     | Protein subunit | Sanofi Pasteur + GSK                                                                            | 2<br>(Day0+21)                         | IM | 3   |

|                                                                                                        |                 |                                                                                                     |                |    |     |
|--------------------------------------------------------------------------------------------------------|-----------------|-----------------------------------------------------------------------------------------------------|----------------|----|-----|
| <b>CpG1018/Alum-adjuvanted Recombinant SARS-CoV-2 Trimeric S-protein Subunit Vaccine (SCB-2019)</b>    | Protein subunit | Clover Biopharmaceuticals Inc./Dynavax                                                              | 2<br>(Day0+21) | IM | 3   |
| <b>COVAX-19® Recombinant spike protein + adjuvant SPIKOGEN®</b>                                        | Protein subunit | Vaxine Pty Ltd./CinnaGen Co.                                                                        | 2<br>(Day0+21) | IM | 3   |
| <b>MVC-COV1901 (S-2P protein + adjuvant CpG 1018)</b>                                                  | Protein subunit | Medigen Vaccine Biologics + Dynavax + NIAID                                                         | 2<br>(Day0+28) | IM | 4   |
| <b>FINLAY-FR anti-SARS-CoV-2 Vaccine (RBD + adjuvant)</b>                                              | Protein subunit | Instituto Finlay de Vacunas *                                                                       | 2<br>(Day0+28) | IM | 2   |
| <b>FINLAY-FR-2 anti-SARS-CoV-2 Vaccine (RBD chemically conjugated to tetanus toxoid plus adjuvant)</b> | Protein subunit | Instituto Finlay de Vacunas                                                                         | 2<br>(Day0+28) | IM | 3   |
| <b>EpiVacCorona (EpiVacCorona vaccine based on peptide antigens for the prevention of COVID-19)</b>    | Protein subunit | Federal Budgetary Research Institution State Research Center of Virology and Biotechnology "Vector" | 2<br>(Day0+21) | IM | 3   |
| <b>RBD (baculovirus production expressed in Sf9 cells) Recombinant SARS-CoV-2 vaccine (Sf9 Cell)</b>   | Protein subunit | West China Hospital + Sichuan University                                                            | 2<br>(Day0+28) | IM | 3   |
| <b>IMP CoVac-1 (SARS-CoV-2 HLA-DR peptides)</b>                                                        | Protein subunit | University Hospital Tuebingen                                                                       | 1<br>(Day0)    | SC | 1/2 |

|                                                                                          |                 |                                       |                                         |    |     |
|------------------------------------------------------------------------------------------|-----------------|---------------------------------------|-----------------------------------------|----|-----|
| <b>UB-612 (Multitope peptide based S1-RBD-protein based vaccine)</b>                     | Protein subunit | Vaxxinity                             | 2<br>(Day0+28)                          | IM | 3   |
| <b>AdimrSC-2f (recombinant RBD +/- Aluminium)</b>                                        | Protein subunit | Adimmune Corporation *                | NR                                      | NR | 1   |
| <b>CIGB-669 (RBD+AgnHB)</b>                                                              | Protein subunit | CIGB *                                | 3<br>(Day0+14+28)<br>Or<br>(Day0+28+56) | IN | 1/2 |
| <b>CIGB-66 (RBD+aluminium hydroxide)</b>                                                 | Protein subunit | CIGB *                                | 3<br>(Day0+14+28)<br>Or<br>(Day0+28+56) | IM | 3   |
| <b>BECOV2</b>                                                                            | Protein subunit | Biological ELimited                   | 2<br>(Day0+28)                          | IM | 3   |
| <b>Recombinant Sars-CoV-2 Spike protein, Aluminum adjuvanted (Nanocovax)</b>             | Protein subunit | Nanogen Pharmaceutical Biotechnology* | 2<br>(Day0+21)                          | IM | 3   |
| <b>Recombinant protein vaccine S-268019 (using Baculovirus expression vector system)</b> | Protein subunit | Shionogi                              | 2<br>(Day0+21)                          | IM | 3   |

|                                                                                                                  |                 |                                                               |                        |          |   |
|------------------------------------------------------------------------------------------------------------------|-----------------|---------------------------------------------------------------|------------------------|----------|---|
| <b>SARS-CoV-2-RBD-Fc fusion protein (AKS-452)</b>                                                                | Protein subunit | University Medical Center Groningen + Akston Biosciences Inc. | NR                     | SC or IM | 2 |
| <b>COVAC-1 and COVAC-2 sub-unit vaccine (spike protein) + SWE adjuvant</b>                                       | Protein subunit | University of Saskatchewan                                    | 2 (Day0+28)            | IM       | 2 |
| <b>GBP510, a recombinant surface protein vaccine with adjuvant AS03 (aluminium hydroxide)</b>                    | Protein subunit | SK Bioscience Co., Ltd. and CEPI                              | 2 (Day0+28)            | IM       | 3 |
| <b>Razi Cov Pars, recombinant spike protein</b>                                                                  | Protein subunit | Razi Vaccine and Serum Research Institute                     | 3 (Day 0 + 21 +51)     | IM       | 3 |
| <b>MF59 adjuvanted SARS-CoV-2 Sclamp vaccine</b>                                                                 | Protein subunit | The University of Queensland                                  | 2 (Day0+28)            | IM       | 1 |
| <b>SK SARS-CoV-2 recombinant surface antigen protein subunit (NBP2001) + adjuvanted with alum.</b>               | Protein subunit | SK Bioscience Co., Ltd.                                       | 2 (Day0+28)            | IM       | 1 |
| <b>SpFN (spike ferritin nanoparticle) uses spike proteins with a liposomal formulation QS21 (ALFQ) adjuvant.</b> | Protein subunit | Walter Reed Army Institute of Research (WRAIR)                | 2-3 (Day 0 + 28 + 180) | IM       | 1 |
| <b>EuCorVac-19; A spike protein using the recombinant protein technology and with an adjuvant.</b>               | Protein subunit | POP Biotechnologies and EuBiologics Co.,Ltd                   | 2 (Day0+21)            | IM       | 3 |
| <b>ReCOV: Recombinant two-component spike and RBD protein COVID-19 vaccine (CHO cell).</b>                       | Protein subunit | Jiangsu Rec-Biotechnology                                     | 2 (Day0+21)            | IM       | 3 |

|                                                                                                                              |                 |                                                                          |                    |      |     |
|------------------------------------------------------------------------------------------------------------------------------|-----------------|--------------------------------------------------------------------------|--------------------|------|-----|
| <b>Recombinant SARS-CoV-2 Fusion Protein Vaccine (V-01)</b>                                                                  | Protein subunit | Livzon Pharmaceutical                                                    | 2<br>(Day0+21)     | IM   | 3   |
| <b>Recombinant SARS-CoV-2 Vaccine (CHO cell)</b>                                                                             | Protein subunit | National Vaccine and Serum Institute, China; Beijing Zhong Sheng Heng Yi | 2<br>(Day 0)       | IM   | 3   |
| <b>CoVepiT vaccine: SARS-CoV-2 multi-target peptide vaccine (targeting Spike, M, N, and several non-structural proteins)</b> | Protein subunit | OSE Immunotherapeutics                                                   | 1-2<br>(Day 0+-21) | SC   | 1   |
| <b>CoV2-OGEN1, protein-based vaccine</b>                                                                                     | Protein subunit | USSF/Vaxform                                                             | 1-2<br>(Day 0±14)  | Oral | 1   |
| <b>QazCoVac-P - COVID-19 Subunit Vaccine</b>                                                                                 | Protein subunit | Research Institute for Biological Safety Problems                        | 1-2<br>(Day 0+21)  | IM   | 1/2 |
| <b>RBD protein recombinant SARS-CoV-2 vaccine (Noora Vaccine)</b>                                                            | Protein subunit | Bagheiat-allah University of Medical Sciences                            | 3<br>(Day0+21+35)  | IM   | 3   |
| <b>Baiya SARS-CoV-2 VAX1, a plant-based subunit vaccine (RBD-Fc + adjuvant)</b>                                              | Protein subunit | Baiya Phytopharm Co., Ltd.                                               | 2<br>(Day 0+21)    | IM   | 1   |
| <b>SCB-2020S, an adjuvanted recombinant SARS-CoV-2 trimeric S-protein (from B.1.351 variant)</b>                             | Protein subunit | Clover Biopharmaceuticals AUS Pty Ltd                                    | 2<br>(Day 0+21)    | IM   | 2   |
| <b>202-CoV; SARS-CoV-2 spike trimer protein + adjuvant, CpG7909.</b>                                                         | Protein subunit | Shanghai Zerun Biotechnology + Walvax Biotechnology + CEPI               | 2<br>(Day 0+28)    | IM   | 1/2 |

|                                                                                                                                                            |                 |                          |                       |    |     |
|------------------------------------------------------------------------------------------------------------------------------------------------------------|-----------------|--------------------------|-----------------------|----|-----|
| <b>Recombinant protein RBD fusion dimer adjuvanted vaccine (COVID-19 Vaccine Hipra)</b>                                                                    | Protein subunit | Laboratorios Hipra, S.A. | 2<br>(Day 0+21)       | IM | 3   |
| <b>Versamune-CoV-2FC vaccine, recombinant S1 antigen</b>                                                                                                   | Protein subunit | Hospital do Coracao      | 3<br>(Day0+28)        | NR | 1/2 |
| <b>SII B.1.351 + Matrix-M1 adjuvant, a monovalent SII SARS-CoV-2 B.1.351 (Beta) variant vaccine</b>                                                        | Protein subunit | Novavax                  | 2<br>(Day0+21)        | IM | 1/2 |
| <b>SII Bivalent + Matrix-M1 adjuvant, a bivalent SII vaccine containing antigen for both the ancestral strain and B.1.351 (Beta) variant of SARS-CoV-2</b> | Protein subunit | Novavax                  | 1<br>(Day0)           | IM | 1/2 |
| <b>SII B.1.617.2 + Matrix-M1 adjuvant, a monovalent SII SARS-CoV-2 B.1.617.2 (Delta) variant vaccine</b>                                                   | Protein subunit | Novavax                  | 1-2<br>(Day 0 +/- 21) | IM | 1/2 |
| <b>SCTV01C. A Bivalent Recombinant Trimeric S Protein vaccine against SARS-CoV-2 Variants</b>                                                              | Protein subunit | Sinocelltech Ltd.        | 1<br>(Day0)           | IM | 3   |
| <b>SARS-CoV-2 Protein Subunit Recombinant Vaccine</b>                                                                                                      | Protein subunit | Bio Farma                | 2<br>(Day 0+ 28)      | IM | 2/3 |
| <b>PIKA-Adjuvanted Recombinant SARS-CoV-2 Spike (S) Protein Subunit Vaccine</b>                                                                            | Protein subunit | Yisheng Biopharma        | 2<br>(Day 0+ 7)       | IM | 2/3 |



|                                                                                                                                            |                 |                                   |                  |    |     |
|--------------------------------------------------------------------------------------------------------------------------------------------|-----------------|-----------------------------------|------------------|----|-----|
| <b>PepGNP-SARSCoV2, A CD8 T-cell priming adaptive vaccine composed of a Coronaviruses specific peptides mounted on a gold nanoparticle</b> | Protein subunit | Emergex Vaccines Holding Limited  | 2<br>(Day 0+ 21) | ID | 1/2 |
| <b>SARS-CoV-2 Vaccine (IN-B009)</b>                                                                                                        | Protein subunit | HK inno.N Corporation             | 2<br>(Day 0+ 21) | IM | 1   |
| <b>SARS-CoV-2 Protein Subunit Recombinant Vaccine adjuvanted With Alum+CpG 1018</b>                                                        | Protein subunit | PT Bio Farma                      | 2<br>(Day 0+ 28) | IM | 3   |
| <b>Adjuvanted SARS-CoV-2 (COVID-19) Beta Variant RBD Recombinant Protein (DoCo-Pro-RBD-1 + MF59)</b>                                       | Protein subunit | University of Melbourne           | 1<br>(Day 0)     | IM | 1   |
| <b>V-01-351/V-01D Bivalence Vaccine (Omicron) or V-01D-351</b>                                                                             | Protein subunit | Livzon Pharmaceutical Group Inc.  | 1<br>(Day 0)     | IM | 2   |
| <b>Betuvax-CoV-2 COVID-19 vaccine</b>                                                                                                      | Protein subunit | Human Stem Cell Institute, Russia | 2<br>(Day 0+ 28) | IM | 1/2 |
| <b>VXS-1223U Microarray patch (HD-MAP) vaccine composed of ARS-CoV-2 spike protein (HexaPro)</b>                                           | Protein subunit | Vaxxas Pty Ltd                    | 1<br>(Day 0)     | ID | 1   |
| <b>PRIME-2-CoV_Beta, Orf Virus Expressing SARS-CoV_2 Spike and Nucleocapsid Proteins</b>                                                   | Protein subunit | Speransa Therapeutics             | 2<br>(Day 0+ 28) | IM | 1   |

|                                                                                                                                                                                  |                                   |                                                        |                  |    |     |
|----------------------------------------------------------------------------------------------------------------------------------------------------------------------------------|-----------------------------------|--------------------------------------------------------|------------------|----|-----|
| <b>ACM-SARS-CoV-2-beta ACM-CpG vaccine candidate (ACM-001)</b>                                                                                                                   | Protein subunit                   | ACM Biolabs                                            | 2<br>(Day 0+ 28) | IN | 1   |
| <b>Recombinant spike (rS) (SARS-CoV-2 rS) nanoparticle and quadrivalent hemagglutinin (HA) nanoparticle influenza vaccine (qNIV) combination vaccine with Matrix-M™ adjuvant</b> | Non covid vaccine+protein subunit | Novavax                                                | 1<br>(Day 0)     | IM | 2   |
| <b>A subunit OMV-linked HexaPro spike vaccine. The vaccine platform is based on outer</b>                                                                                        | Protein subunit                   | Intravacc B.V.                                         | 1<br>(Day 0)     | IN | 1   |
| <b>ARVAC-CG vaccine (recombinant protein vaccine against SARS-CoV-2)</b>                                                                                                         | Protein subunit                   | Laboratorio Pablo Cassara S.R.L.                       | 2<br>(Day 0+ 28) | IM | 2/3 |
| <b>Recombinant SARS-CoV-2 S-Trimer Vaccine (CHO Cell) booster</b>                                                                                                                | Protein subunit                   | Binhui Biopharmaceutical Co., Ltd.                     | 1<br>(Day 0)     | IM | 1   |
| <b>Subunit recombinant vaccine; Convacell</b>                                                                                                                                    | Protein subunit                   | St. Petersburg Research Institute of Vaccines and Sera | 2<br>(Day 0+ 21) | IM | 2/3 |

SARS-COV2, severe acute respiratory syndrome coronavirus; NIAID, National Institute of Allergy and Infectious Diseases; AMS, Academy of Military Science; IN, intranasal; IM, Intramuscular; SC, Subcutaneous; IV, Intravenous; IH, Inhaled; AE, Aerosol; RBD, receptor-binding domain; S, spike; Ad, adenovirus; GM-CSF, Granulocyte-macrophage colony-stimulating factor; ;\* Development has been suspended and the candidate vaccine has been removed from the landscape summary analysis. VLP, Virus-Like Particles; CoVLP, Coronavirus-Like Particle COVID-19; VFI, Vaccine Formulation Institute; VIDO, Vaccine and Infectious Disease Organization; CIGB, Center for Genetic Engineering and Biotechnology;
